# Supplementary material for: Special-Effect and Conventional Pigments in Black Light Art: A Multi-Technique Approach to an In-Situ Investigation
Source: MDPI journal article supplement (doi:10.3390/ma15196671), 2022-09-26
Supplement: s1 [file s1]

**Table S1.** Chemical structures of the organic dyes or pigments identified in the paintings examined.

| Dye or pigment       | Structure                                                                            |
|----------------------|--------------------------------------------------------------------------------------|
| Rhodamine 6G         | 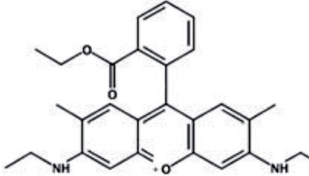   |
| Rhodamine B          |    |
| Solvent Yellow 160:1 |   |
| Pigment Orange 43    |  |
| Pigment Orange 62    |  |
| Pigment Red 254      |  |
| Pigment Green 7      |  |

|                 |                                                                                    |
|-----------------|------------------------------------------------------------------------------------|
| Pigment Blue 15 | 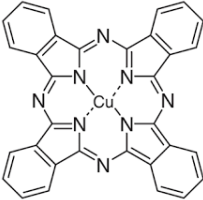 |
| Pigment Blue 60 |  |

**Table S2.** HQI of the first and second match obtained from the library search with the correlation algorithm on emission spectra.

|                       | Area                                                   | HQI 1st    | HQI 2nd    |
|-----------------------|--------------------------------------------------------|------------|------------|
| <b>Red and orange</b> | <i>The grammar of fire - Canto II, red (2)</i>         | R371 0.009 | R376 0.016 |
|                       | <i>The North star and the tree of life, red (1)</i>    | R435 0.024 | R376 0.086 |
|                       | <i>Earthquake, red (1)</i>                             | R376 0.028 | R371 0.044 |
|                       | <i>The North star and the tree of life, orange (6)</i> | O232 0.510 | R371 0.620 |
| <b>Yellow</b>         | <i>The North star and the tree of life, yellow (5)</i> | Y173 0.098 | -          |
|                       | <i>Earthquake, yellow (2)</i>                          | Y173 0.193 | -          |
| <b>Green</b>          | <i>The grammar of fire - Canto I, green (2)</i>        | G590 0.019 | Y173 0.038 |
|                       | <i>The North star and the tree of life, green (4)</i>  | G590 0.010 | Y173 0.062 |
|                       | <i>Earthquake, green (3)</i>                           | Y173 0.088 | G590 0.202 |
| <b>Blue</b>           | <i>The grammar of fire - Canto II, blue (1)</i>        | B029 0.091 | -          |
|                       | <i>The North star and the tree of life, blue (3)</i>   | B029 0.061 | -          |

**Table S3.** HQI of the first and second match obtained from the library search with the correlation algorithm on reflectance spectra.

|                       | <b>Area</b>                                            | <b>HQI 1st</b> | <b>HQI 2nd</b> |
|-----------------------|--------------------------------------------------------|----------------|----------------|
| <b>Red and orange</b> | <i>The grammar of fire - Canto II, red (2)</i>         | R371 0.031     | O232 0.034     |
|                       | <i>The North star and the tree of life, red (1)</i>    | R435 0.042     | R376 0.102     |
|                       | <i>Earthquake, red (1)</i>                             | R435 0.268     | R376 0.318     |
|                       | <i>The North star and the tree of life, orange (6)</i> | O232 0.225     | R371 0.258     |
| <b>Yellow</b>         | <i>The North star and the tree of life, yellow (5)</i> | Y173 0.114     | -              |
|                       | <i>Earthquake, yellow (2)</i>                          | Y173 0.179     | -              |
| <b>Green</b>          | <i>The North star and the tree of life, green (4)</i>  | G590 0.154     | -              |
|                       | <i>Earthquake, green (3)</i>                           | G590 0.381     | Y173 0.727     |
| <b>Blue</b>           | <i>The grammar of fire - Canto II, blue (1)</i>        | B029 0.235     | -              |
|                       | <i>The North star and the tree of life, blue (3)</i>   | B029 0.056     | -              |
