# Supplementary material for: Special-Effect and Conventional Pigments in Black Light Art: A Multi-Technique Approach to an In-Situ Investigation
Source: MDPI journal article supplement (doi:10.3390/ma15196671), 2022-09-26
Supplement: s1 [file s1]

**Figure S1.** (a) Raman spectra of a layer of the commercial Flashe Fluo color Bengal Red 435 on a glass slide, obtained respectively by a portable Raman microprobe with 785-nm excitation (grey line) and the SSE™ Bravo spectrometer (black line); (b) Raman spectra of a layer of the commercial Flashe Fluo color Light Yellow 173, obtained respectively by a portable Raman microprobe with 785-nm excitation (grey line) and the SSE™ Bravo spectrometer (black line).

**Figure S2.** (a) Emission spectrum ( $\lambda_{\text{exc}} = 435 \text{ nm}$ ) of *The grammar of fire - Canto I*, area 1; (b) emission spectrum of the same area after irradiation with a Wood's lamp and then removal of the UV radiation source; (c) emission spectrum of *The North star and the tree of life*, area 2, after irradiation with a Wood's lamp and then removal of the UV radiation source.
